# Supplementary material
Source: PubMed Central journal article supplement (PMC3321852)
Supplement: supp_blood-2011-10-386268_blood-2011-10-386268-1.pdf [file supp_blood-2011-10-386268_blood-2011-10-386268-1.pdf]

### Supplemental Information

Supplement Figure 1: Elaboration on Data in Figure 1.

The doses represented are the FBS0701 salt form. i.e. 16 mg/kg/d fo salt form is equivalent to 14.5 mg/kg/d, and 32 mg/kg/day equivalent to 29 mg/kg/day dose of free drug.

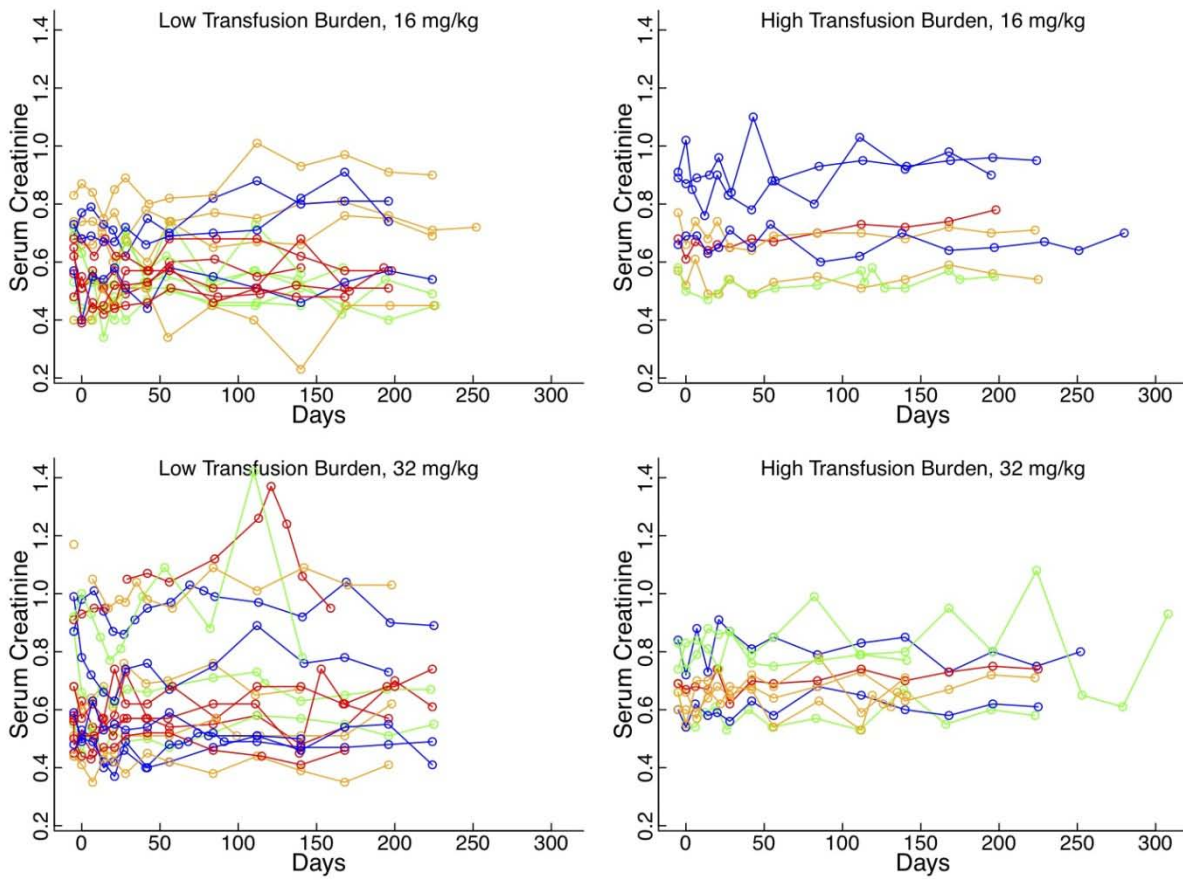

Screening Value Displayed at -5 Days

Mon Oct 3 08:31:46 2011

Supplemental figure 2. Statistical Analysis of the Data Represented in Figure 3.

The data regarding the change in LIC at 24 weeks in response to an FBS0701 dose of 29 mg/kg/d can be described by a normal distribution with a mean of -0.3 mg/g liver (dw) (95% CI -2.31 to 1.78), a standard deviation (SD) of 4.95 (95% CI 3.86 to 6.89) and a median of 0.2 (95% CI -2.6 to 1). The Interquartile Range (IQR) is 4.27, thus, two patients with the greatest increase in LIC would be regarded as outliers (outlier >1.5 IQR). If these two patients were not included in the analysis of the 29 mg/kg/d dose group, the mean change in LIC would be -1.26 mg/g liver (dw).

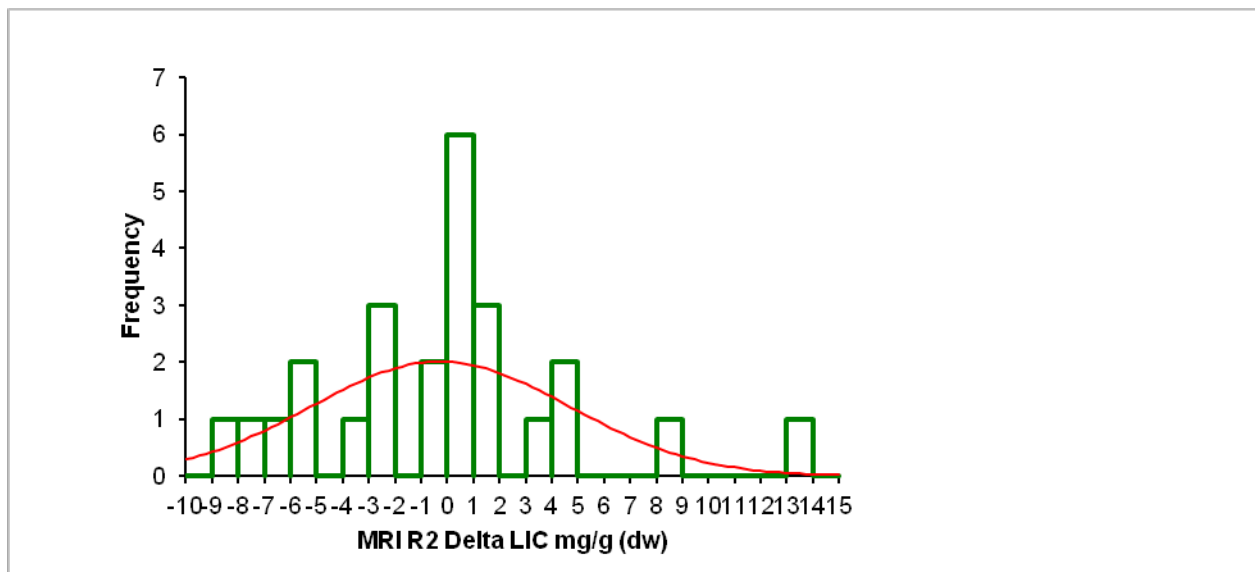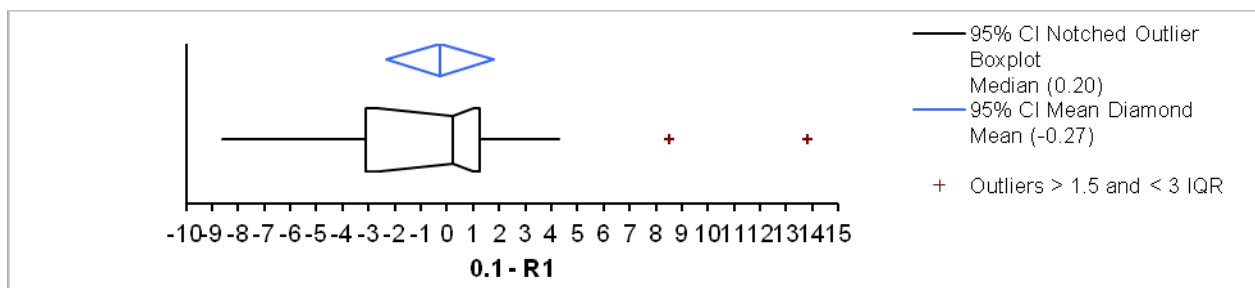

### Supplemental figure 3. Distribution of Transfusion Iron Intake

#### Supplemental Figure 3a: Mean Daily Transfusion Iron Intake (TII) in the Low Dose Group

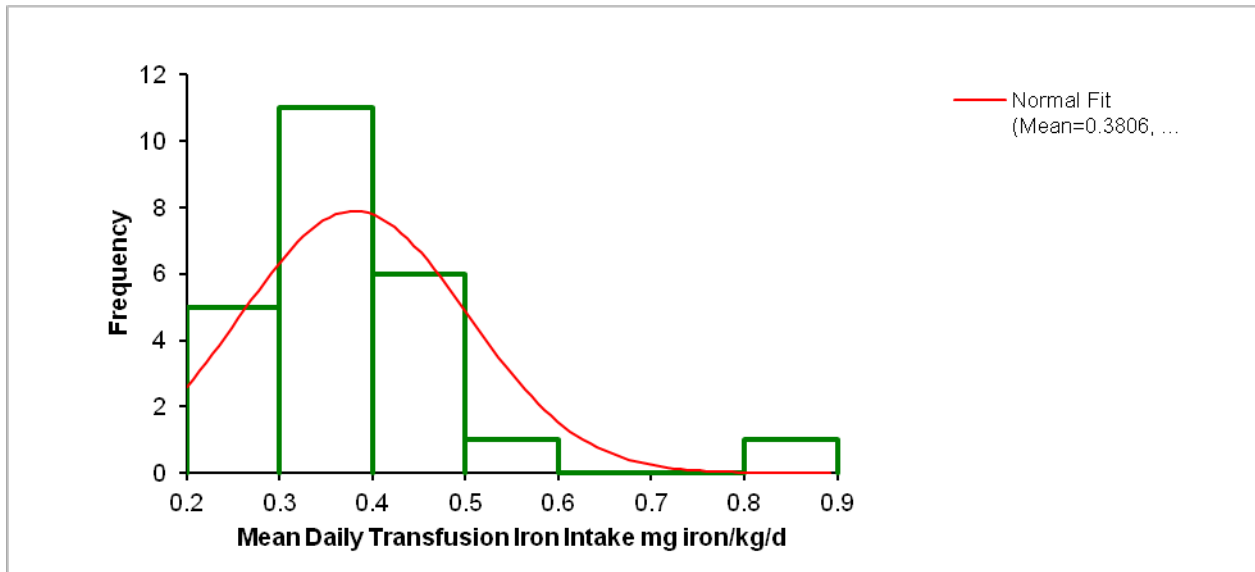

#### Supplemental figure 3b. Mean Daily Transfusion Iron Intake (TII) in High Dose Group

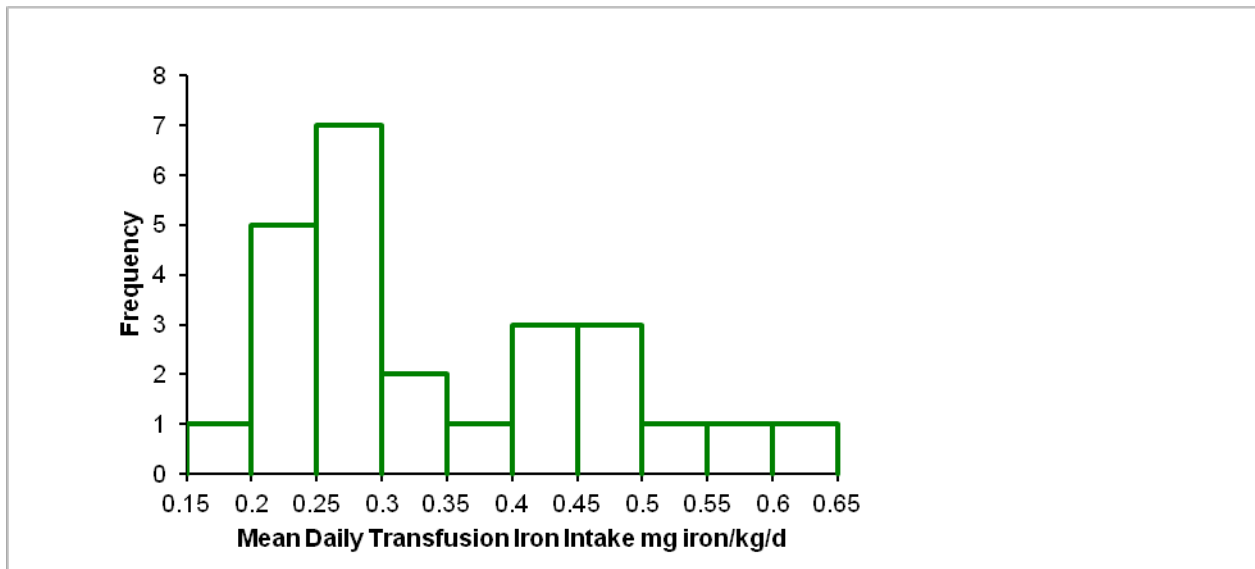

**Supplemental Figure 4: Ferritin values during the study time frame, by dose and transfusional iron burden cohort.**

Median ferritin values are show. Error bars represent the inter-quartile range.

**Ferritin by dose/transfusion burden cohort**

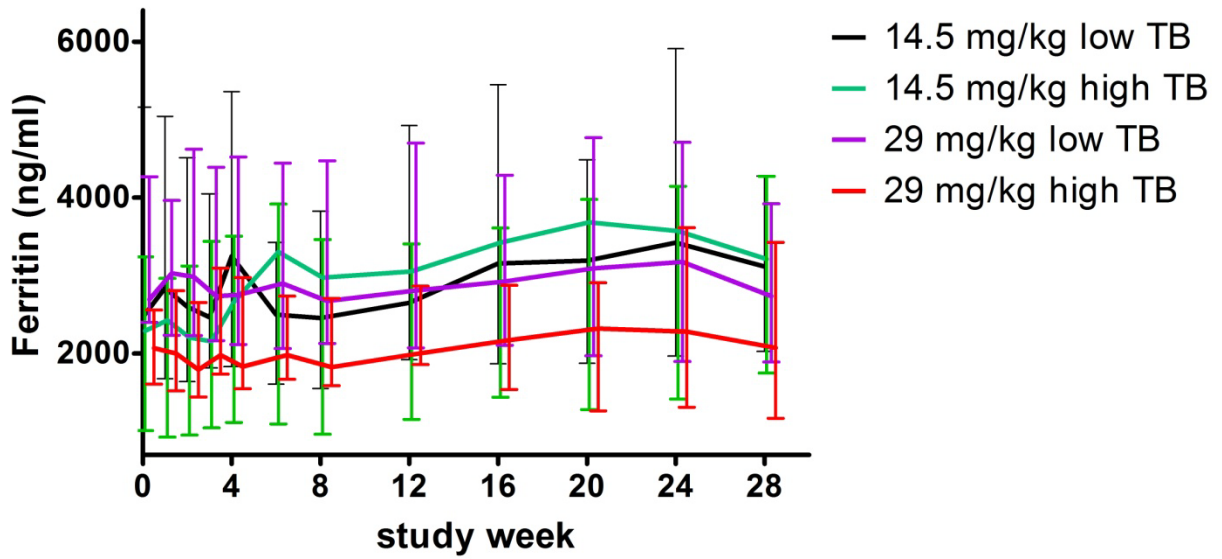

**Supplemental Table 1. Treatment-related adverse events in the FBS0701 phase 2 trial**

| Pt ID                              | Adverse Event by System Organ Class and Preferred Term | Severity | Causality        | Outcome      | FBS0701 Treatment Arm (mg/kg/d) |
|------------------------------------|--------------------------------------------------------|----------|------------------|--------------|---------------------------------|
| <b>Infections and infestations</b> |                                                        |          |                  |              |                                 |
| 0713                               | Upper Respiratory Tract Infection                      | Moderate | Possibly Related | Resolved     | 32                              |
| <b>Gastrointestinal disorders</b>  |                                                        |          |                  |              |                                 |
| 0204                               | Abdominal Distention                                   | Mild     | Possibly Related | Resolved     | 16                              |
| 0304                               | Flatulence                                             | Mild     | Possibly Related | Not Resolved | 16                              |
| 0314                               | Flatulence                                             | Mild     | Possibly Related | Resolved     | 16                              |
| 0401                               | Flatulence                                             | Mild     | Possibly Related | Resolved     | 16                              |
| 0306                               | Flatulence                                             | Mild     | Possibly Related | Resolved     | 16                              |
| 0101                               | Nausea                                                 | Mild     | Possibly Related | Resolved     | 32                              |
| 0301                               | Clinical Colitis                                       | Mild     | Possibly Related | Resolved     | 32                              |
| 0402                               | Flatulence                                             | Mild     | Possibly Related | Resolved     | 32                              |
| 0402                               | Constipation                                           | Mild     | Possibly Related | Resolved     | 32                              |
| 0402                               | Abdominal Pain                                         | Mild     | Possibly Related | Resolved     | 32                              |
| 0402                               | Abdominal Pain                                         | Mild     | Possibly Related | Resolved     | 32                              |
| 0503                               | Dyspepsia                                              | Mild     | Probably Related | Not Resolved | 32                              |
| 0706                               | Diarrhea                                               | Mild     | Possibly Related | Resolved     | 32                              |
| 1012                               | Abdominal Pain Upper                                   | Mild     | Probably Related | Resolved     | 32                              |
| 1106                               | Abdominal Pain                                         | Mild     | Possibly Related | Resolved     | 32                              |
| 1202                               | Flatulence                                             | Mild     | Possibly Related | Resolved     | 32                              |
| 0102                               | Diarrhea                                               | Mild     | Probably Related | Resolved     | 32                              |
| 0403                               | Constipation                                           | Mild     | Possibly Related | Resolved     | 32                              |
| <b>Nervous system disorders</b>    |                                                        |          |                  |              |                                 |
| 0401                               | Headache                                               | Mild     | Possibly Related | Resolved     | 16                              |
| 0405                               | Headache                                               | Mild     | Possibly Related | Resolved     | 32                              |
| 1202                               | Headache                                               | Moderate | Possibly Related | Resolved     | 32                              |
| <b>Investigations</b>              |                                                        |          |                  |              |                                 |
| 0304                               | Transaminases Increased                                | Moderate | Probably Related | Resolved     | 16                              |
| 0305                               | Transaminases Increased                                | Moderate | Probably Related | Resolved     | 16                              |
| 0404                               | Transaminases Increased                                | Mild     | Possibly Related | Resolved     | 16                              |
| 0101                               | Urine Color Abnormal                                   | Mild     | Probably Related | Not Resolved | 32                              |

|                                                        |                                     |          |                  |              |    |
|--------------------------------------------------------|-------------------------------------|----------|------------------|--------------|----|
| 0402                                                   | Transaminases Increased             | Mild     | Possibly Related | Resolved     | 32 |
| 0405                                                   | Transaminases Increased             | Mild     | Possibly Related | Resolved     | 32 |
| 0506                                                   | Creatinine Increased                | Moderate | Possibly Related | Resolved     | 32 |
| 0406                                                   | Transaminases Increased             | Mild     | Possibly Related | Resolved     | 32 |
| 0309                                                   | Transaminases Increased             | Mild     | Possibly Related | Resolved     | 32 |
| 0309                                                   | Gamma-glutamyltransferase Increased | Mild     | Possibly Related | Resolved     | 32 |
| 0315                                                   | Gamma-glutamyltransferase Increased | Mild     | Possibly Related | Resolving    | 32 |
| 0315                                                   | Alanine Aminotransferase Increased  | Mild     | Possibly Related | Resolving    | 32 |
| 0403                                                   | Transaminases Increased             | Moderate | Possibly Related | Resolved     | 32 |
| <b>Eye disorders</b>                                   |                                     |          |                  |              |    |
| 1202                                                   | Photophobia                         | Moderate | Possibly Related | Not Resolved | 32 |
| <b>Musculoskeletal and connective tissue disorders</b> |                                     |          |                  |              |    |
| 0401                                                   | Arthralgia                          | Mild     | Possibly Related | Resolved     | 16 |
| 0402                                                   | Arthralgia                          | Mild     | Possibly Related | Resolved     | 32 |
| <b>Metabolism and nutrition disorders</b>              |                                     |          |                  |              |    |
| 0708                                                   | Decreased Appetite                  | Mild     | Possibly Related | Resolved     | 16 |
| <b>Cardiac disorders</b>                               |                                     |          |                  |              |    |
| 0101                                                   | Palpitations                        | Mild     | Possibly Related | Resolved     | 32 |
| <b>Skin and subcutaneous tissue disorders</b>          |                                     |          |                  |              |    |
| 0309                                                   | Sweat Discoloration                 | Mild     | Possibly Related | Resolved     | 32 |
| <b>Blood and lymphatic system disorders</b>            |                                     |          |                  |              |    |
| 0701                                                   | Thrombocytopenia                    | Mild     | Possibly Related | Resolved     | 16 |
| <b>Renal and urinary</b>                               |                                     |          |                  |              |    |
| 0708                                                   | Chromaturia                         | Mild     | Possibly Related | Not Resolved | 16 |
| 0102                                                   | Chromaturia                         | Mild     | Probably Related | Not Resolved | 32 |
| 0313                                                   | Chromaturia                         | Mild     | Probably Related | Resolved     | 32 |

**(Supplemental Table 1, continued from prior page)**

**Supplemental Table 2: Pharmacodynamics****Safety Population**

| Parameter                                                       | Time Point                      | 14.5 mg/kg/d<br>(N=24) | 29 mg/kg/d<br>(N=27) | p-value <sup>[3]</sup> |
|-----------------------------------------------------------------|---------------------------------|------------------------|----------------------|------------------------|
| R2 Liver Iron Concentration<br>(mg/g dry tissue) <sup>[1]</sup> | Baseline <sup>[2]</sup>         |                        |                      |                        |
|                                                                 | N                               | 24                     | 27                   |                        |
|                                                                 | Mean (SD)                       | 13.2 (6.64)            | 13.9 (7.82)          |                        |
|                                                                 | Median                          | 11.9                   | 11.4                 |                        |
|                                                                 | Min, Max                        | 4.3, 24.5              | 3.9, 30.2            |                        |
|                                                                 | Week 12                         |                        |                      |                        |
|                                                                 | N                               | 24                     | 25                   |                        |
|                                                                 | Mean (SD)                       | 15.9 (9.45)            | 13.6 (8.68)          |                        |
|                                                                 | Median                          | 11.7                   | 10.7                 |                        |
|                                                                 | Min, Max                        | 4.8, 34.6              | 4.6, 34.2            |                        |
|                                                                 | Change from Baseline to Week 12 |                        |                      | 0.0025                 |
|                                                                 | N                               | 24                     | 25                   |                        |
|                                                                 | Mean (SD)                       | 2.7 (4.05)             | -0.2 (2.83)          |                        |
|                                                                 | Median                          | 0.9                    | 0.1                  |                        |
|                                                                 | Min, Max                        | -4.5, 10.8             | -6.9, 4.4            |                        |
|                                                                 | Week 24                         |                        |                      |                        |
|                                                                 | N                               | 24                     | 25                   |                        |
|                                                                 | Mean (SD)                       | 16.3 (10.57)           | 13.2 (8.51)          |                        |
|                                                                 | Median                          | 11.5                   | 9.3                  |                        |
|                                                                 | Min, Max                        | 4.6, 37.4              | 3.4, 30.8            |                        |
|                                                                 | Change from Baseline to Week 24 |                        |                      | 0.0287                 |
|                                                                 | N                               | 24                     | 25                   |                        |
|                                                                 | Mean (SD)                       | 3.1 (5.55)             | -0.3 (4.95)          |                        |
|                                                                 | Median                          | 1.1                    | 0.2                  |                        |
|                                                                 | Min, Max                        | -4.9, 19.0             | -8.6, 13.8           |                        |

| Parameter                                         | Time Point | 14.5 mg/kg/d<br>(N=24) | 29 mg/kg/d<br>(N=27) | p-value <sup>[3]</sup> |
|---------------------------------------------------|------------|------------------------|----------------------|------------------------|
| LIC normalized for initial LIC (%) <sup>[4]</sup> | Week 12    |                        |                      | 0.0162                 |
|                                                   | N          | 24                     | 25                   |                        |
|                                                   | Mean (SD)  | 18.1 (27.30)           | -0.6 (24.80)         |                        |
|                                                   | Median     | 13.0                   | 1.4                  |                        |
|                                                   | Min, Max   | -22.6, 101.8           | -46.0, 67.2          |                        |
|                                                   | Week 24    |                        |                      | 0.0336                 |
|                                                   | N          | 24                     | 25                   |                        |
|                                                   | Mean (SD)  | 20.1 (33.86)           | -0.7 (34.31)         |                        |
|                                                   | Median     | 11.3                   | 2.6                  |                        |
|                                                   | Min, Max   | -41.9, 103.3           | -50.7, 95.8          |                        |

<sup>[1]</sup> Per FerriScan® MRI.

<sup>[2]</sup> Baseline MRI was to be performed from Days -14 to -7; the Relative Day column in the listings captures the actual number of days prior to dosing that the MRI was conducted.

<sup>[3]</sup> P-value is from Analysis of Covariance model with effects for treatment group, baseline value and historical transfusion burden

for R2 Liver Iron Concentration. P-value is from Analysis of Covariance model with effect for treatment group and historical transfusion burden for LIC normalized for initial LIC and LIC normalized for iron intake by blood transfusion

<sup>[4]</sup> LIC normalized for initial LIC is the percentage change from baseline in LIC.
